# Supplementary material
Source: publisher figshare collection journal article supplement (https://frontiersin.figshare.com/ndownloader/files/13643609)

(A)

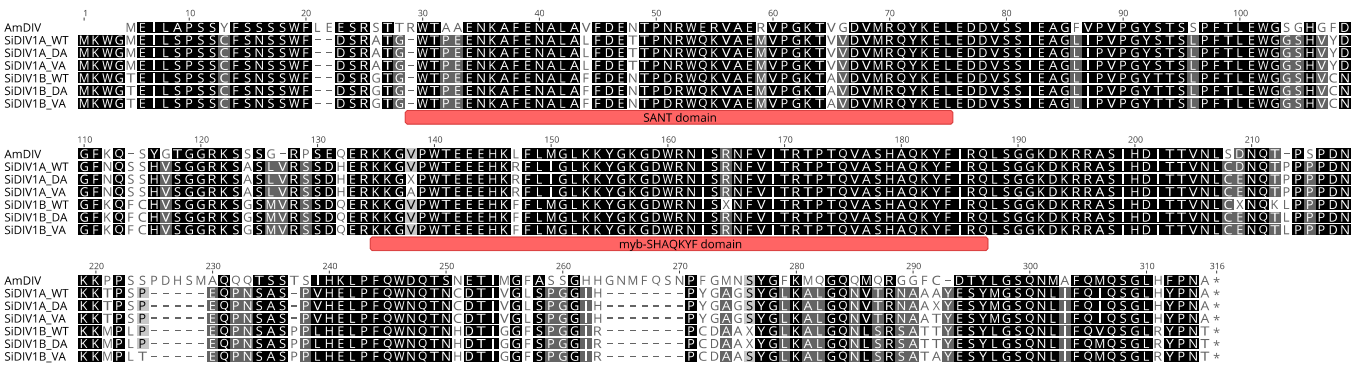

(B)

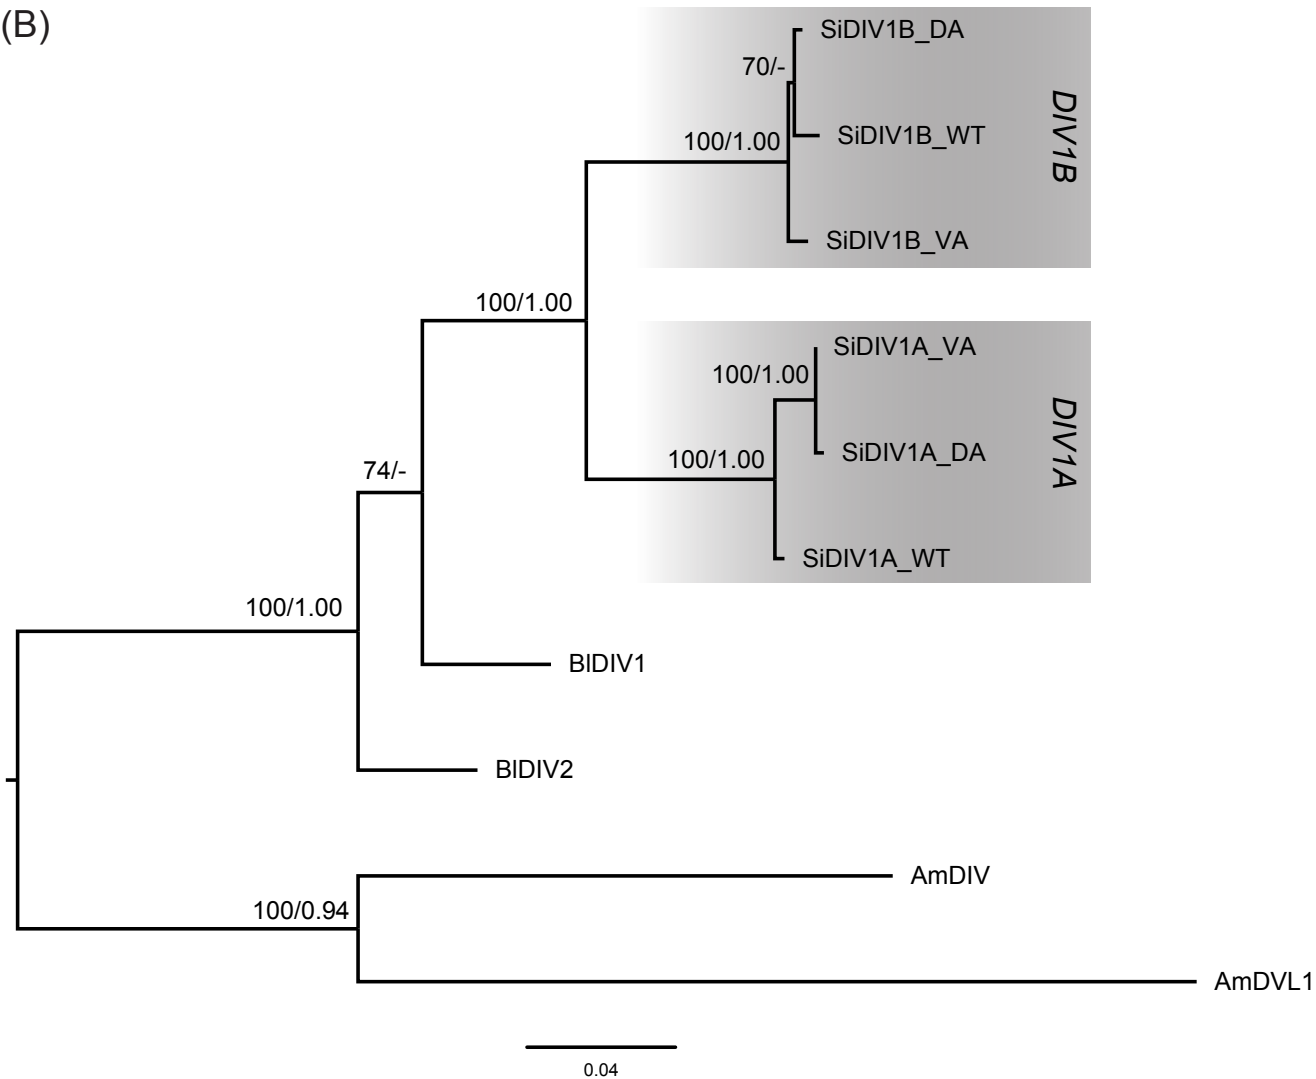

Supplement: Supplementary file [file 13643609]
